# Supplementary material
Source: PubMed Central journal article supplement (PMC3296361)
Supplement: NIHMS335897-supplement-Supplemental_Table.pdf [file NIHMS335897-supplement-Supplemental_Table.pdf]

The final, published version of this manuscript is available at <http://archinte.ama-assn.org/cgi/content/short/171/17/1571>

**Supplemental Table 1. Relative Risks (95% CI) of Clinical Depression (Broader Definition) According to Coffee Consumption.<sup>a</sup>**

|                                 | <b>Caffeinated coffee consumption (cups)</b>   |                  |                  |                  |                  | <b><i>P</i> Trend</b> |
|---------------------------------|------------------------------------------------|------------------|------------------|------------------|------------------|-----------------------|
|                                 | <b>≤1/wk</b>                                   | <b>2–6/wk</b>    | <b>1/d</b>       | <b>2–3/d</b>     | <b>≥4/d</b>      |                       |
| No. of cases                    | 1,721                                          | 941              | 2,329            | 1,385            | 206              |                       |
| Person-years                    | 112,268                                        | 62,760           | 161,871          | 104,819          | 17,851           |                       |
| Age-adjusted <sup>b</sup>       | 1.00                                           | 1.00 (0.92–1.08) | 0.95 (0.89–1.01) | 0.87 (0.81–0.93) | 0.76 (0.66–0.88) | <0.001                |
| Multivariate model <sup>c</sup> | 1.00                                           | 0.98 (0.90–1.06) | 0.92 (0.86–0.98) | 0.83 (0.77–0.89) | 0.71 (0.61–0.82) | <0.001                |
| Sensitivity model <sup>d</sup>  | 1.00                                           | 0.96 (0.88–1.05) | 0.94 (0.86–1.00) | 0.85 (0.79–0.92) | 0.74 (0.65–0.83) | <0.001                |
|                                 | <b>Decaffeinated coffee consumption (cups)</b> |                  |                  |                  |                  | <b><i>P</i> Trend</b> |
|                                 | <b>≤1/wk</b>                                   | <b>1–4/wk</b>    | <b>5–6/wk</b>    | <b>1/d</b>       | <b>≥2/d</b>      |                       |
| No. of cases                    | 3,514                                          | 885              | 361              | 1,457            | 365              |                       |
| Person-years                    | 256,644                                        | 58,780           | 23,542           | 94,588           | 26,014           |                       |

The final, published version of this manuscript is available at <http://archinte.ama-assn.org/cgi/content/short/171/17/1571>

|                                        |        |                  |                  |                  |                  |       |
|----------------------------------------|--------|------------------|------------------|------------------|------------------|-------|
| Age-adjusted <sup>b</sup>              | 1.00   | 1.10 (1.02–1.19) | 1.14 (1.02–1.27) | 1.14 (1.07–1.21) | 1.03 (0.93–1.15) | 0.003 |
| Multivariate model <sup>c</sup>        | 1.00   | 1.11 (1.03–1.19) | 1.13 (1.01–1.26) | 1.13 (1.06–1.20) | 1.02 (0.92–1.14) | 0.01  |
| Sensitivity model <sup>d</sup>         | 1.00   | 1.12 (1.03–1.22) | 1.11 (0.99–1.24) | 1.15 (1.08–1.23) | 1.05 (0.96–1.15) | 0.004 |
| Excluding coffee drinkers <sup>e</sup> |        |                  |                  |                  |                  |       |
| No. of cases                           | 1,325  | 366              | 149              | 643              | 179              |       |
| Person-years                           | 89,199 | 22,929           | 9,461            | 41,065           | 12,372           |       |
| Multivariate model <sup>c</sup>        | 1.00   | 1.07 (0.95–1.20) | 1.07 (0.90–1.27) | 1.04 (0.95–1.15) | 0.93 (0.79–1.09) | 0.83  |

<sup>a</sup>Coffee consumption was computed as the cumulative average between 1980 through 2002 (see Methods section). (see Methods section). Clinical depression (n cases=6,582) = physician-diagnosed depression or antidepressant medication use (1996–2006).

<sup>b</sup>Adjusted for age (continuous) and time interval.

<sup>c</sup>Further adjusted for total energy intake (continuous), current menopausal hormones (binary), smoking status (never smoked, past smoker, current smoker), body-mass index (<25, 25–29.9, ≥30 kg/m<sup>2</sup>), physical activities (quintiles), marital status (married/partnership, widowed, separated/divorced/single), not involve in social or community group (binary), retired (binary), reported diagnosis of diabetes (binary), cancer (binary), high blood pressure (binary), myocardial infarction or angina (binary) and for Mental Health Index-5 score (86–100, 76–85, 53–75) in 1996.

Coffee, Caffeine, and Risk of Depression Among Women

Michel Lucas, PhD, RD; Fariba Mirzaei, MD, MPH, ScD; An Pan, PhD; Olivia I. Okereke, MD, SM; Walter C. Willett, MD, DrPH; Éilis J. O'Reilly, ScD; Karestan Koenen, PhD; Alberto Ascherio, MD, DrPH

Arch Intern Med. 2011;171(17):1571-1578. doi:10.1001/archinternmed.2011.393

The final, published version of this manuscript is available at <http://archinte.ama-assn.org/cgi/content/short/171/17/1571>

<sup>d</sup>The same as the multivariate model but using a latency of exposure of 8-year minimum (see Methods section).

<sup>e</sup>Women drinking 1 or more cups of caffeinated coffee per day were excluded (2,662 cases remaining).
